# Supplementary material for: ATP11A promotes EMT by regulating Numb PRRL in pancreatic cancer cells
Source: PeerJ journal article supplement (doi:10.7717/peerj.13172), 2022-03-23
Supplement: S1.pdf [file S1.pdf]

Customer order number:GOSE0222462

# **Overexpression carrier build information sheet**

**Gike gene**

---

## One Overexpression carrier construction

### Genetic information

Genetic name: ATP11A (NM\_015205).

Species: Human

#### 1. Carrier enzyme cut

##### 1.1 Carrier information:

Carrier name: GV230

Component order: CMV-MCS-EGFP-SV40-Neomycin

Clone site: XhoI / KpnI

Control number: CON083

Carrier map:

[http://www.genechem.com.cn/service/index.php?ac=gene&at=vector\\_search&keyword=GV230](http://www.genechem.com.cn/service/index.php?ac=gene&at=vector_search&keyword=GV230)

0 The carrier instructions are available for download

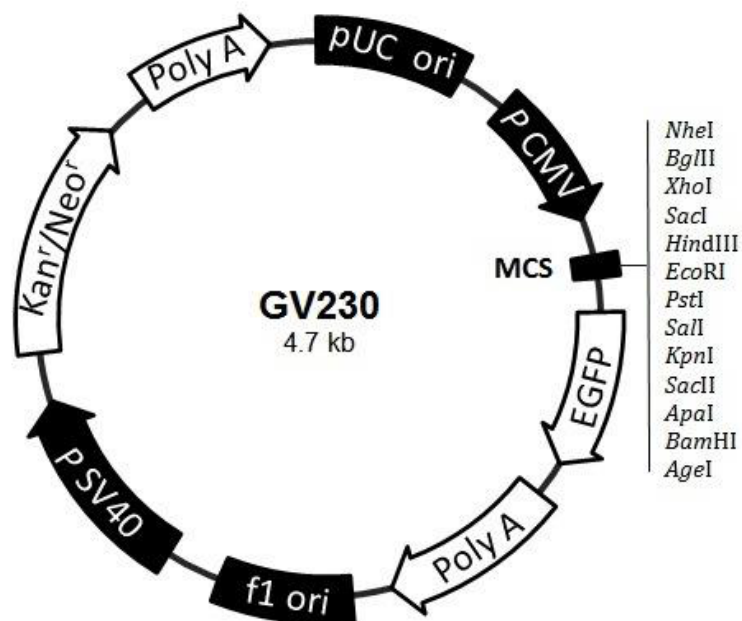

## 1.2 Enzyme cut results:

Electrophoresis:

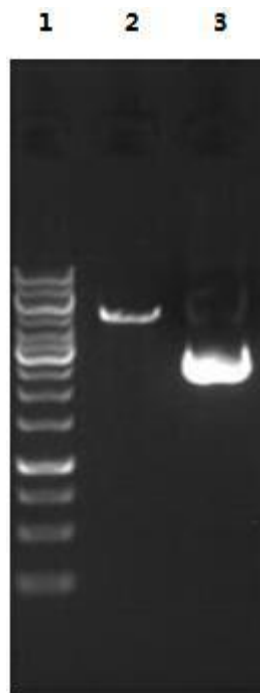

Electrophoresis diagram illustration:

1#: 10kb Marker (From top to bottom, the strips are:10kb、 8kb、 6kb、 5kb、 4kb、 3.5kb、 3kb、 2.5kb、 2kb、

1.5kb、 1kb、 750bp、 500bp、 250bp)

2: Carrier enzyme cut product

Unenzyme-cut vectors (plasmids extracted from bacteria have different migrations due to the presence of superspirules, open rings, linear and other conformations.)

Rate, in agar gelling electrophoresis presents different size stripes, so at this time the plasmid electrophoresis band can only be judged as the size of plasmid molecular weight

reference, can not be used as an accurate basis for judgment. After digestion by single enzyme cutting, the plasmids present a homogeneous electrophoretic band, which can be paired with Marker

than to determine its molecular weight size)

**Note:** Due to the company's quality control needs, the carrier after a large number of enzyme cutting, after quality identification, quality qualified enzyme cutting fragments will be a large number of preservation for use

The carrier is built for multiple users, so the picture appears in multiple users' reports, so customers should use the diagram carefully. If necessary to publish an article

To, please mark in the experimental material: GV230 carrier, XhoI / KpnI enzyme cutting, purchased from Shanghai Jikai Gene Chemistry Technology Co., Ltd.

---

## 2. Acquisition of the target gene fragment

### 2.1 Primer

| ID                 | seq                                                    |
|--------------------|--------------------------------------------------------|
| ATP11A(57190-1)-p1 | TACCGGACTCAGATCTCGAGCGCCACCATGGACTGCAGCCTCGTGCGGACGCTC |
| ATP11A(57190-1)-p2 | GATCCCGGGCCCGGGTACCGTGAAACTCAGGCTGCTGGAAGTCTGAGAAAAG   |

Primer Description: Contains exchange pairing base, enzyme cutting point, and contains the target gene 5' end part of the sequence for PCR fishing purpose gene

### 2.2 PCR results

PCR product size:3451

Electrophoresis:

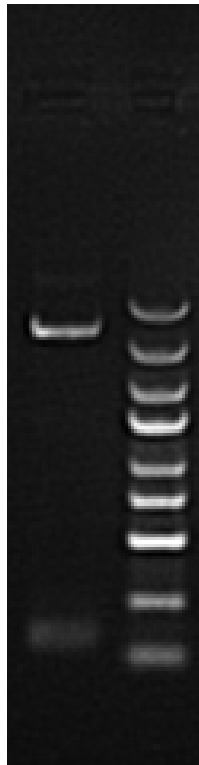

Electrophoresis diagram illustration:

Marker is top-down:5 kb,3 kb,2 kb,1.5 kb,1 Kb,750 bp,500bp,250 bp,100 bp

## 3. Recombinant plasmid build

### 3.1 The product is exchanged into a linear expression carrier

### 3.2 PCR identification primer

| ID         | seq                    |
|------------|------------------------|
| KL57190-p3 | CTGCCGGAGCTGCAGCGCGG   |
| KL57190-p4 | CGTCGCCGTCCAGCTCGACCAG |

### 3.3 PCR identification recombinant clones

Positive converter PCR product size:1145

Electrophoresis:

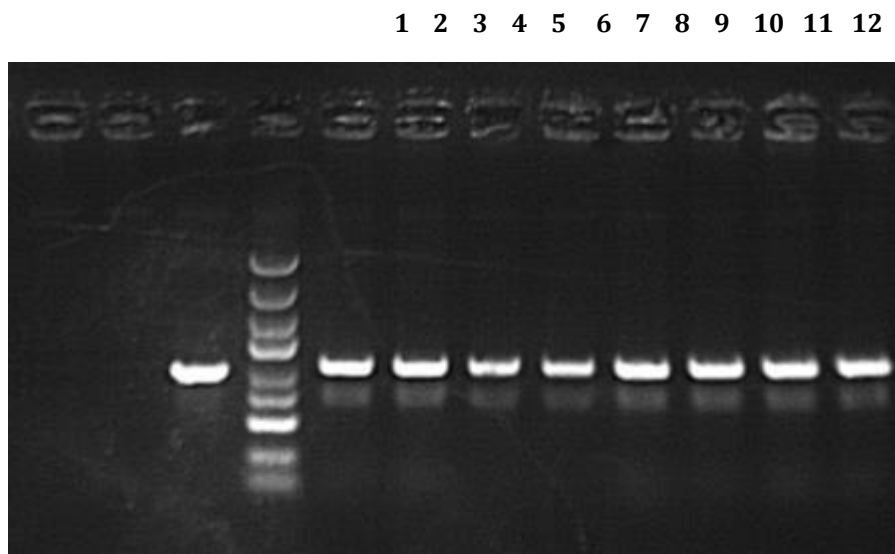

Electrophoresis diagram illustration:

1: Negative control(ddH2O).

2:Negative control (empty from the control group).

3: Positive control(GAPDH).

4:Marker is 5 kb, 3 kb,2 kb,1.5 kb,1 Kb,750 bp, 500bp,250 bp,100 bp fromtop to bottom

5-12:1-8 converter

### 4. Analysis of positive cloning sequencing results and results:

Match results:

GCTACCGGACTCAGATCTCGAGCGCCACCATGGACTGCAGCCTCGTGCGGACGCTCGTGACAGATACTGTG  
CAGGAGAAGAGAATTGGGTGGACAGCAGGACCATCTACGTGGGACACAGGGAGCCACCTCCGGGCGCAGAGG  
CCTACATCCCACAGAGATACCCAGACAACAGGATCGTCTCGTCCAAGTACACATTTTGGAACTTTATACCCA  
AGAATTTATTTGAACAATTCAGAAGAGTAGCCAACCTTTTATTTCCTTATCATATTTCTGGTGCAGTTGATTA  
TTGATACACCCACAAGTCCAGTGACAAGCGGACTTCCACTCTTCTTTGTCATTACTGTGACGGCTATCAAAC  
AGGGTTATGAAGACTGGCTTCGACATAAAGCAGACAATGCCATGAACCAGTGTCTGTTCATTTCATTCAGC  
ACGGCAAGCTCGTTCCGAAACAAAGTCGAAAGCTGCGAGTTGGGGACATTGTCATGGTTAAGGAGGACGAG  
ACCTTTCCCTGCGACTTGATCTTCCCTTTCCAGCAACCGGGGAGATGGGACGTGCCACGTCACCACCGCCAGC  
TTGGATGGAGAATCCAGCCATAAAACGCATTACGCGGTCCAGGACACCAAAGGCTTCCACACAGAGGAGGAT  
ATCGGGGACTTCAGCCACCATCGAGTGTGAGCAGCCCCAGCCGACCTCTACAAGTTCGTGGGTGCGATCA  
ACGTTTACAGTGACCTGAATGACCCCGTGGTGAGGCCCTTAGGATCGGAAAACCTGCTGCTTAGAGGAGCTA  
CACTGAAGAACACTGAGAAAATCTTTGGTGTGGCTATTTACACGGGAATGGAACCAAGATGGCATTAAAT  
TATCAATCAAAATCTCAGAAGCGATCTGCCGTGGA AAAATCGATGAATGCGTTCCTCATTGTGTATCTCTGC  
ATTCTGATCAGCAAAGCCCTGATAAACACTGTGCTGAAATACATGTGGCAGAGTGAGCCCTTTCGGGATGAG  
CCGTGGTATAATCAGAAAACGGAGTCGGAAGGCAGAGGAATCTGTTCCCTCAAGGCATTCACGGACTTCTG  
GCCTTCATGGTCCTCTTTAACTACATCATCCCTGTGTCCATGTACGTCACGGTCGAGATGCAGAAGTTCCTC  
GGCTCTTACTTCATCACCTGGGACGAAGACATGTTTGACGAGGAGACTGGCGAGGGGCTCTGGTGAACACG  
TCGGACCTCAATGAAGAGCTGGGACAGGTGGAGTACATCTTACAGACAAGACCGGCACCCCTCACGAAAAC  
AACATGGAGTTCAAGGAGTGCTGCATCGAAGGCCATGTCTACGTGCCC  
CACGTCTGCAACGGGCAGGTCTCCAGAGTCGTCAGGAATCGACATGATTGACTCGTCCCCAGCGTC  
AACGGGAGGGAGCGCGAGGAGCTGTTTTTCCGGGCCCTCTGTCTCTGCCACACCGTCCAGGTGAAAGACGAT  
GACAGCGTAGACGGCCCCAGGAAATCGCCGGACGGGGGAAATCCTGTGTGTACATCTCATCTCGCCCGAC  
GAGGTGGCGCTGGTCAAGGTGTCCAGAGACTTGGCTTTACCTACCTAAGGCTGAAGGACAATTACATGGAG  
ATATTAACAGGGAGAACCACATCGAAAGGTTTGAATTGCTGGAATTTTGAGTTTTGACTCAGTCAGAAG  
GAGAATGAGTGTAATTGTA AAAATCTGCTACAGGAGAAATTTATCTGTTTTGCAAAGGAGCAGATTCTTCGA  
TATTTCCCCGAGTGATAGAAGGCAAAGTTGACCAGATCCGAGCCAGAGTGGAGCGTAACGCAGTGGAGGGGC  
TCCGAACTTTGTGTGTTGCTTATAAAAAGGCTGATCCAAGAAGAATATGAAGGCATTTGTAAGCTGCTGCAG  
GCTGCCAAAGTGGCCCTTCAAGATCGAGAGAAAAGTTAGCAGAAGCCTATGAGCAAATAGAGAAAGATCT  
TACTCTGCTTGGTGCTACAGCTGTTGAGGACCGGCTGCAGGAGAAAGCTGCAGACACCATCGAGGCCCTGCA  
GAAGGCCGGGATCAAAGTCTGGGTCTCACGGGAGACAAGATGGAGACGGCC  
GCGGCCACGTGCTACGCCTGCAAGCTCTTCCGCAGGAACACGCAGCTGCTGGAGCTGACCACCAAGAGGATC  
GAGGAGCAGAGCCTGCACGACGTCTGTTCGAGCTGAGCAAGACGGTCTGCGCCACAGCGGGAGCCTGACC  
AGAGACAACCTGTCCGACTTTCAGCAGATATGCAGGACTACGGTTTAATTATCGACGGAGCTGCACTGTCT  
CTGATAATGAAGCCTCGAGAAGACGGGAGTTCCGGCAACTACAGGGAGCTTTCCTGGAAATCTGCCGGAGC  
TGCAGCGCGGTGCTCTGCTGCCGCATGGCGCCCTTGCAGAAGGCTCAGATTGTTAAATTAATCAAATTTTCA  
AAAGAGCACC CAATCACGTTAGCAATTGGCGATGGTGCAAATGATGTCAGCATGATTCTGGAAGCGCACGTG  
GGCATAGGTGTCATCGGCAAGGAAGGCCGCCAGGCTGCCAGGAACAGCGACTATGCAATCCCAAAGTTTAAG  
CATTTGAAGAAGATGCTGCTTGTTCACGGGCATTTTTTATTACATTAGGATCTCTGAGCTCGTGCAGTACTTC  
TTCTATAAGAACGTCTGCTTCATCTTCCCTCAGTTTTTATACCAGTTCTTCTGTGGTTTTTCACAACAGACT  
TTGTACGACACCGGTATCTGACCCTCTACAAC

ATCAGCTTCACCTCTCTCCCATCCTCTCCTGTACAGCCTCATTCATGGAGCAGCATGGGGGGGGGCATGACG  
GGGGGAGACCCCGGGGGGGGGGGGGGGTCTTTGGTGCTTATTCGTTTGAGAATACAACCTGGAGACACACAC  
AACGGGGGGAGATTGGGGACTGGGGGTTTGGAGACCGCTGGATTACCGTGGGTGGTCACAGTTACTACTAA  
AGCTTGCAATTGGACACTACTGGACTACTTGGCACACACCATTTTGTTCATCTGGGGGGTCTGCTGCTGTTCTAC  
GTTTTTTTTTTTGGCTTCTGGGGGGGGGGGGGATCTGGGGGTTACCCACACAGAGAGTACTACGTTTTTCAT  
CCAGATGGTTCWGGGGGCCTGGGGCCATCGTGCTGGGGTGACCACCTCTCTCTCCCCCCTCCTCAAGAAAG  
TCCTGTTGGGGGCAGCTGTGGCCAACAGCAAGAGAGAGGTCCAGACTAAGAGCCAGTGCCTTTGGGCAGTCA  
CACATCTTTATGCTTTCTCTCAGACTTCCAGCACTGAGTTTC  
ANDGGTACCGCGGGCCCGGGGGCACCGGGGTCGCCACCATCATGGGAGA

**Compare the results to show that the ok is measured**
